# Supplementary material for: Post-Collisional Magmatic Evolution of the Castelo Intrusive Complex, Espírito Santo, Brazil: New U-Pb Geochronological Data and Integration of Petrographic and Isotopic Evidence
Source: Preprints.org preprint supplement (doi:10.20944/preprints202411.0370.v1), 2024-11-06
Supplement: Supplementary file 1 [file supplementary]

## Sheet: Geochemical data
Sample	Source	Rock	SiO2	TiO2	Al2O3	Fe2O3	MnO	MgO	CaO	Na2O	K2O	P2O5	Cr2O3	LOI	Total	Ba	Rb	Sr	Zn	Zr	V	Ce	Co	Cs	Cu	Dy	Er	Eu	Ga	Hf	Ho	La	Lu	Mo	Nb	Nd	Ni	Pr	Sm	Sn	Ta	Tb	Th	Tl	Tm	U	Y	Yb	W
GFTG	Meyer 2017	Granite	65.4	0.94	14.52	5.25	0.07	1.03	2.69	2.8	5.61	0.33		0.8	99.44	2200	217.3	483.9	90	627.8	53	410.4	7	1.3	7.6	9.18	4.31	3.05	19.9	15.2	1.6	205.4	0.5	1.2	44.4	146.7	2.7	42.24	21.95	4	2.5	1.99	45.5	0.5	0.59	3.1	47.1	3.75
GFZA	Meyer 2017	Granodiorite	65.34	0.94	14.48	5.35	0.07	1.05	2.69	2.81	5.49	0.34	0.002	0.8	99.362	2319	200.3	491	92	676.6	65	420.7	6.8	1.5	8.8	9.46	4.47	3.26	21	17.2	1.58	217.4	0.55	1.4	47.5	151.2	3	44.08	23.14	4	3.1	2.03	50.3	0.5	0.61	4	45.1	3.8	8.7
GMSC	Meyer 2017	Tonalite	64.08	1.03	14.91	5.7	0.08	1.23	2.99	2.96	5.38	0.36	0.004	0.6	99.324	2672	187	647.7	96	712.1	58	439.3	8.2	1.3	7.7	8.7	3.9	3.22	21.9	16.9	1.47	227.9	0.45	1.3	43.5	160.1	3.8	45.27	22.27	3	2.3	1.81	40.7	0.5	0.49	3.3	42.1	3.19	1
GCG	Meyer 2017	Granodiorite	66.27	0.91	14.47	5.08	0.07	1.03	2.74	2.9	5.18	0.31	0.003	0.5	99.463	2010	190.1	477.5	87	566.2	47	367.2	6.2	1.3	8.8	7.32	3.15	2.79	19.9	13.9	1.27	189	0.38	1.8	39.7	132	5.2	37.92	18.58	3	2	1.63	36.8	0.5	0.46	4	37.2	2.69
MOGA	Meyer 2017	Monzonite	54.35	2.41	14.9	10.51	0.16	3.08	5.77	3.01	3.68	1.24	0.004	0.2	99.314	2738	125.5	1145.8	109	448.7	161	306.1	19.7	0.9	14.4	8.95	3.92	4.25	22.1	10.5	1.48	151.3	0.45	2.3	50.8	132.8	15.5	35.5	20.52	3	2.7	1.92	11	0.5	0.52	2.4	43	3.11	1.2
MOD	Meyer 2017	Monzodiorite	56.8	2.01	14.71	9.16	0.13	2.81	5.21	3.06	3.61	1.05	0.005	0.8	99.355	2724	120	1149	101	554.1	145	285	17.3	1	13.7	7.86	3.44	3.79	21.6	12.7	1.28	129.9	0.39	0.7	42.3	123.2	14.2	32.04	18.75	2	2.2	1.63	33	0.5	0.44	2.7	35.5	2.78	1.2
MOSC	Meyer 2017	Monzonite	56.08	2.01	14.37	9.38	0.14	2.74	5.58	3.16	3.96	1.09	0.008	0.8	99.318	2712	156.5	968.6	116	692.6	131	396.4	17.9	1.5	21.6	10.2	4.05	4.58	20.2	16	1.53	194.7	0.5	1	47.8	161	14.9	43.42	23.46	3	2.3	2.07	20.9	0.7	0.55	3.4	43.8	3.45	0.5
MOPQ	Meyer 2017	Monzodiorite	56.19	2.27	14.46	9.74	0.13	2.62	5.23	2.76	3.87	1.17	0.007	0.9	99.347	2771	135.8	1026.1	125	685.3	141	354.2	12.5	1.9	8.8	10.02	4.28	4.44	22.2	15.4	1.63	171.3	0.47	0.7	46.8	144.8	11.2	39.24	22.08	4	2.4	2.07	14	0.6	0.55	2.1	45.5	3.49	1.3
MOSE	Meyer 2017	Diorite	55.88	2.24	14.76	10.47	0.14	3.59	5.27	1.69	3.24	1.06	0.012	1	99.352	2290	148.3	846.5	138	694.4	153	299.8	21.5	2.7	17.4	8.22	3.4	3.68	21.5	15.6	1.34	139.5	0.42	1.2	44.4	124.2	25.5	33.3	20.2	4	2.2	1.76	21.3	0.7	0.46	3.2	40.5	2.9	1
MODI	Meyer 2017	Monzonite	54	2.43	14.43	10.54	0.14	3.25	5.68	2.99	3.43	1.42	0.004	1	99.314	2900	95.4	1369.2	106	486.1	157	302.2	22.4	0.9	17.9	8.1	3.26	4.4	20.8	11.3	1.34	160	0.36	2	42.8	135.8	16.5	35.05	20.43	2	2.2	1.8	13.8	0.4	0.43	2.1	36.6	2.69	1.2
MOS	Meyer 2017	Monzonite	52.9	2.49	14.7	10.4	0.14	3.69	6.2	2.99	3.56	1.42	0.009	0.8	99.299	2587	103.1	1190.5	104	563	168	316.8	23.7	0.9	19	8.26	3.67	4.35	20.8	12.7	1.3	154.7	0.4	1.8	47.1	135.9	28.4	35.74	20.17	3	2.4	1.75	13.9	0.5	0.47	2.2	38.2	2.92
PFG-02	Medeiros 2013	Granite	67.49	0.65	14.38	4.18	0.06	0.76	2.15	2.91	5.91	0.22		0.8	99.51	1633	230.2	422.9	80	499.4	36	294.8	5.3	1.5	10.3	7.87	3.33	2.3	21.1	13.4	1.3	155	0.43	4.5	36.8	112.9	3.6	32.71	17.61	4	3	1.47	38.3	0.5	0.47	3.3	38.4	3.14
PGF-41	Medeiros 2013	Granite	65.62	0.68	14.91	4.65	0.06	0.79	2.33	2.88	6.17	0.24		1.2	99.53	1633	205.1	410.2	85	489.1	36	337.1	5.7	0.9	12.6	8.92	4.5	2.45	19.5	12.9	1.67	182.7	0.52	5.3	34.3	119.1	4.5	36.48	17.68	3	2.8	1.63	38.1	0.5	0.63	2.4	58.7	3.64
PFG-26	Medeiros 2013	Tonalite	63.85	1.08	14.96	5.67	0.07	1.36	2.95	3.09	5.13	0.38	0.002	0.9	99.442	2005	199.7	491.3	95	657.5	59	310.7	9	2	17	6.83	2.92	2.68	20.5	16.9	1.13	141.4	0.38	1.3	40.8	117.3	9.4	34.18	17.78	6	2.4	1.36	44.3	0.6	0.43	4	33.2	2.62	0.6
PFG-29	Medeiros 2013	Monzonite	55.32	2.15	15.21	9.33	0.12	2.92	5.41	3.07	3.87	1.03	0.004	0.9	99.334	2634	109.8	1032	112	627.3	143	329	16.4	0.7	17.6	7.66	3.15	4.22	22.4	16	1.38	165.7	0.38	0.2	43.5	138.4	11.6	38.24	20.3	4	2.1	1.6	14.2	0.5	0.44	1.8	37.6	3.07	0.7
PFG-47	Medeiros 2013	Monzodiorite	55.16	2.25	14.41	10.54	0.14	2.88	5.65	2.92	3.42	1.21	0.004	0.8	99.384	2434	88.9	1028.7	80	199.3	126	285.6	18.4	1.2	22.9	7.48	2.9	3.91	20	5.4	1.22	148.5	0.35	2.3	43.6	118.6	15	32.53	18.14	3	2.1	1.5	12.7	0.5	0.42	2.3	37.4	2.67	1
PFG-45	Medeiros 2013	Monzodiorite	54.91	2.47	14.24	10.53	0.14	3.13	5.35	2.81	3.64	1.23	0.007	0.9	99.357	2267	92.2	917.6	123	600.9	138	359.4	20.8	0.5	24.8	9.12	3.66	4.17	19.6	15	1.48	197.9	0.44	3.2	45.4	149.5	21.2	42.44	22.19	4	2.2	1.73	13.4	0.4	0.52	2	42.4	3.25	0.9
CA1.1	De Campos 2004	Syenodiorite	50.19	2.96	13.31	11.5423	0.14	5.5	6.35	3.96	3.09	2.12			99.1623	2316	63	1395	137	147	349		24		86				21						25		66										60
CA1.2	De Campos 2004	Monzodiorite	53.34	2.64	14.33	9.81438	0.11	5.11	5.7	2.04	4.14	1.78			99.0044	3358	105	1120	192	178	178		4		69				22						26		115										34
CA2.1	De Campos 2004	Diorite	57.25	1.87	13.42	10.54	0.14	4.21	5.57	1.57	3.48	1.69			99.74	1460	97	825	154	446	311		36		38				25						25		36										71
CA2.2	De Campos 2004	Tonalite	58.17	2.18	13.63	10.1555	0.14	3.86	5.35	0.99	3.27	1.29			99.0355	992	184	758	175	623	281		25		28				28						29		37										61
CA2.3	De Campos 2004	Tonalite	57.58	2.18	13.65	10.5078	0.14	3.66	5.43	0.99	3.82	1.24			99.1978	1815	93	884	143	423	279		24		53				22						25		34										69
CA3.1	De Campos 2004	Granodiorite	61.89	1.74	14.86	7.42109	0.09	2.26	2.4	1.29	5.03	1.08			98.0611	751	222	507	130	550	49		28		26				27						26		22										54
CA3.2	De Campos 2004	Granodiorite	66.97	0.74	15.28	4.73958	0.07	1.45	2.4	2.13	4.89	0.31			98.9796	1446	200	509	127	395	137		12		26				22						21		18										24
CA4.1	De Campos 2004	Granodiorite	68.15	0.8	14.23	4.42714	0.11	0.85	2.73	2.33	5.38	0.36			99.3671	1308	211	475	134	448	81		6		27				30						24		44										45
CA4.3	De Campos 2004	Granite	70.78	0.53	14.47	2.98698	0.06	0.52	1.55	2.18	6.02	0.09			99.187	598	265	263	121	459	59		8		18				24						22		18										34
CA4.4	De Campos 2004	Granite	72.44	0.35	13.3	2.58139	0.03	0.42	1.49	1.94	5.9	0.12			98.5714	1483	185	585	101	321	35		5		22				23						16		34										30
CA5.1	De Campos 2004	Granite	71.99	0.36	14.04	2.69262	0.06	0.55	1.44	2.29	5.92	0.18			99.5226	909	265	228	195	330	55		5		28				21						22		28										54
CA5.2	De Campos 2004	Granite	72.12	0.47	13.81	2.9771	0.06	0.78	1.46	1.49	5.83	0.17			99.1671	1039	219	3335	143	438	50		4		25				24						18		36										34
CA5.3	De Campos 2004	Granite	74.17	0.18	13.54	1.74026	0.03	0.35	1.29	3.09	4.93	0.06			99.3803	804	236	157	129	140	36		6		16				21						15		25										18
[truncated: 6 more columns]

## Sheet: Isotopic data
											Ratios b								Ratios c												Dates c										Ratios b							0
Identifier	f206c	204Pb	206Pb	207Pb	U (µg g-1) a	Th/U	207Pb/204Pb	207Pb/206Pb	1s	206Pb/238U	1s	207Pb/235U	1s	208Pb/232Th	1s	207Pb/206Pb	2s (%)	207Pb/235U	2s (%)	206Pb/238U	2s (%)	Rho	208Pb/232Th	2s (%)	207Pb/206Pb	2s	2ssys	206Pb/238U	2s	2ssys	207Pb/235U	2s	2ssys	208Pb/232Th	2s	2ssys	% conc d	207Pb/206Pb	2s%	207Pb/235U	2s%	206Pb/238U	2s%	RHO	207Pb/206Pb	1/206Pb/238U		Identifier	Comments
			CPS	CPS															Data for Wetherill plot c							abs	abs		abs	abs		abs	abs		abs	abs					Data for Tera Was plot c				MASS BIAS
	#DIV/0!	#DIV/0!
FGIL37_001	0.013286	75	101077	6014.79	357.545	4.76235	80.1973	0.05945	0.00096	0.08192	0.0007	0.671495	0.00118811	0.02538	0.0005	0.0595071	4.659	0.67214	5.53059	0.08192	2.98012	0.538843	0.02538	3.94011	585.697	101.114	103.435	507.573	14.5625	16.3113	522.013	22.8276	24.0297	506.7	19.68	20.4675	97.2338	0.05945	6.45921	0.671495	6.45973	0.08192	4.27246	0.661399	1	12.207		FGIL37_001	0
FGIL37_002	0.000400213	1	44766	2696.7	160.469	3.98397	2696.7	0.06024	0.00087	0.08084	0.00062	0.671448	0.00106832	0.02299	0.00033	0.06024	2.88845	0.671448	3.27047	0.08084	1.53389	0.469014	0.02299	2.87081	612.206	62.4096	66.0726	501.135	7.39993	10.3616	521.593	13.4285	15.357	459.5	13.16	13.9014	96.0778	0.06024	5.77689	0.671448	5.77746	0.08084	3.83474	0.663741	1	12.3701		FGIL37_002	0
FGIL37_003	0.00146313	12	147330	8751.4	562.123	2.16371	729.284	0.0594	0.00076	0.07595	0.00058	0.622036	0.000956033	0.02271	0.00037	0.0594	2.55892	0.622036	2.98007	0.07595	1.52732	0.512512	0.02271	3.25848	581.788	55.5726	59.6973	471.903	6.95374	9.75724	491.123	11.6709	13.6627	454	14.42	15.4241	96.0866	0.0594	5.11785	0.622036	5.11841	0.07595	3.8183	0.745994	1	13.1666		FGIL37_003	0
FGIL37_004	0.0383217	58	27098	1587.4	95.7033	2.69067	27.369	0.05858	0.00094	0.08205	0.00063	0.662719	0.00113159	0.02444	0.00041	0.05858	3.20929	0.662719	3.55777	0.08205	1.53565	0.431632	0.02444	3.35516	551.522	70.0538	73.4022	508.347	7.51094	10.5112	516.276	14.5016	16.2796	488.1	16.06	16.9476	98.4643	0.05858	6.41857	0.662719	6.4191	0.08205	3.83912	0.598078	1	12.1877		FGIL37_004	0
FGIL37_005	0.00802423	52	116334	6869.14	436.843	7.68654	132.099	0.05903	0.00097	0.07717	0.00061	0.628091	0.00114586	0.02099	0.00047	0.059047	4.71883	0.628271	5.61101	0.07717	3.03581	0.541045	0.02099	4.47832	568.828	102.704	105.003	479.209	14.0356	15.6629	495.018	22.2247	23.3621	419.9	18.76	19.1164	96.8062	0.05903	6.57293	0.628091	6.57338	0.07717	3.95231	0.60126	1	12.9584		FGIL37_005	0
FGIL37_006	0.000367715	1	48805	2837.03	181.97	4.21702	2837.03	0.05813	0.0009	0.07772	0.0006	0.622923	0.00108167	0.02392	0.00037	0.05813	3.09651	0.622923	3.4601	0.07772	1.544	0.446231	0.02392	3.09365	534.665	67.7858	71.2602	482.499	7.18183	10.0239	491.678	13.5755	15.3289	477.7	14.66	15.2788	98.1332	0.05813	6.19302	0.622923	6.1935	0.07772	3.86001	0.623235	1	12.8667		FGIL37_006	0
FGIL37_007	0.0262421	57	38942	2422.58	141.838	4.50326	42.5014	0.06221	0.00248	0.07956	0.00073	0.682427	0.00258521	0.02538	0.00074	0.06221	7.97299	0.682427	8.18146	0.07956	1.83509	0.224299	0.02538	5.83136	681.336	170.306	171.651	493.496	8.72405	11.278	528.24	34.268	35.1085	506.7	29.22	29.74	93.4226	0.06221	15.946	0.682427	15.9462	0.07956	4.58773	0.287701	1	12.5691		FGIL37_007	0
FGIL37_008	0.000650483	1	27565	1719.5	100.678	4.60933	1719.5	0.06238	0.00151	0.07934	0.00075	0.6824	0.001686	0.02321	0.00061	0.06238	4.8413	0.6824	5.19735	0.07934	1.8906	0.363761	0.02321	5.25636	687.162	103.312	105.511	492.182	8.96506	11.4542	528.224	21.6342	22.9192	463.8	24	24.5858	93.1768	0.06238	9.68259	0.6824	9.68292	0.07934	4.72649	0.488127	1	12.604		FGIL37_008	0
FGIL37_009	0.0233659	43	32979	2026.56	118.908	2.07538	47.1293	0.06145	0.00102	0.08037	0.00062	0.680953	0.00119365	0.02518	0.00053	0.06145	3.31977	0.680953	3.66078	0.08037	1.54286	0.421458	0.02518	4.20969	655.023	71.22	74.406	498.331	7.40315	10.3366	527.35	15.1707	16.9334	502.7	21.1	21.5545	94.4971	0.06145	6.63954	0.680953	6.64003	0.08037	3.85716	0.580895	1	12.4425		FGIL37_009	0
FGIL37_010	0.0222214	139	112175	6412.24	411.001	6.2137	46.1312	0.05729	0.00081	0.07909	0.00059	0.624743	0.0010021	0.0232	0.00046	0.0571629	2.93843	0.623357	3.34294	0.07909	1.59401	0.476828	0.0232	3.96552	497.822	64.7315	68.406	490.689	7.53575	10.3587	491.949	13.1185	14.9261	463.6	18.08	18.7889	99.7438	0.05729	5.65544	0.624743	5.65599	0.07909	3.72993	0.659465	1	12.6438		FGIL37_010	0
FGIL37_011	0.0453894	187	74048.7	4475.25	286.333	2.69902	23.9318	0.06081	0.00088	0.07494	0.00058	0.628333	0.00105394	0.02159	0.00042	0.0604366	3.55092	0.624475	4.20596	0.07494	2.25413	0.535937	0.02159	3.89069	619.243	76.6332	79.6377	465.849	10.1384	12.1866	492.648	16.5513	18.0276	431.8	16.64	17.2332	94.5602	0.06081	5.78852	0.628333	5.78901	0.07494	3.86976	0.668467	1	13.344		FGIL37_011	0
FGIL37_012	0.0268	32	21410.5	1218.76	78.2682	1.64932	38.0862	0.0568	0.0011	0.07927	0.00064	0.62081	0.00127264	0.02555	0.00063	0.0569235	5.22318	0.622159	6.02118	0.07927	2.9955	0.497494	0.02555	4.93151	488.569	115.246	117.356	491.764	14.1986	15.8871	491.2	23.7237	24.7822	510	24.9	25.4229	100.115	0.0568	7.74648	0.62081	7.74688	0.07927	4.03684	0.521092	1	12.6151		FGIL37012	0
FGIL37_013	0.000547659	1	32732	1847.07	118.846	3.98315	1847.07	0.05643	0.00109	0.07981	0.00067	0.62131	0.00127945	0.02378	0.00052	0.05643	3.86319	0.620967	4.21228	0.07981	1.67899	0.398594	0.02378	4.37342	469.327	85.5216	54.8392	494.989	8.0047	11.4164	490.453	16.5184	14.3614	475	20.6	21.5698	100.925	0.05643	7.72639	0.62131	7.7268	0.07981	4.19747	0.543235	1	12.5298		FGIL37_013	0
FGIL37_014	0.000207791	1	86178	5125.87	305.439	4.304	5125.87	0.05948	0.00189	0.08176	0.00093	0.67093	0.00210642	0.02604	0.00146	0.05948	6.35508	0.670522	6.74999	0.08176	2.27495	0.33703	0.02604	11.2135	584.71	137.946	60.1398	506.619	11.0936	12.4739	521.03	27.8898	16.3723	519.7	57.52	258.658	97.2343	0.05948	12.7102	0.67093	12.7104	0.08176	5.68738	0.447458	1	12.2309		FGIL37_014	0
FGIL37_015	0.0673869	282	74853	6352.77	258.779	4.88356	22.5276	0.08487	0.00189	0.08382	0.00083	0.980851	0.00206422	0.0295	0.00112	0.08487	4.45387	0.980851	4.87433	0.0844067	1.98043	0.406299	0.0295	7.59322	1312.57	86.4021	88.5703	518.884	9.88102	12.4059	694.041	24.8079	26.4799	0	43.94	-543.226	74.7626	0.08487	8.90774	0.980851	8.90814	0.08382	1.98043	0.222317	30	11.9303		FGIL37_015	0
FGIL37_016	0.000456366	1	39206	2235.13	136.437	3.76573	2235.13	0.05701	0.00096	0.08327	0.00065	0.654547	0.00115935	0.02381	0.00051	0.05701	3.36783	0.654547	3.71209	0.0838529	1.56119	0.420568	0.02381	4.28391	491.92	74.266	77.4961	515.612	7.74079	10.7465	511.273	15.0217	16.7213	475.7	20.08	20.7801	100.849	0.05701	6.73566	0.654547	6.73618	0.08327	1.56119	0.231762	31	12.0091		FGIL37_016	0
FGIL37_017	0.0951582	167	31459.2	1937.88	114.196	2.93827	11.6041	0.06246	0.00112	0.07983	0.00064	0.687495	0.00128996	0.02482	0.00058	0.0615999	5.76321	0.678027	6.90571	0.0803888	3.80451	0.550922	0.02482	4.67365	660.246	123.533	125.394	495.108	18.1568	19.5238	525.581	28.7354	29.7174	495.5	23.06	23.3709	94.202	0.06246	7.17259	0.687495	7.17303	0.07983	1.60341	0.223533	80	12.5266		FGIL37_017	0
FGIL37_018	0.000656683	1	27347	1617.85	103.603	1.16808	1617.85	0.05916	0.00179	0.07649	0.0008	0.623927	0.00196064	0.0243	0.0013	0.05916	6.05139	0.623927	6.40272	0.0770254	2.09178	0.326701	0.0243	10.6996	572.989	131.614	133.413	475.138	9.58851	11.8083	492.306	25.2906	26.2917	485.3	51.32	51.6117	96.5127	0.05916	12.1028	0.623927	12.103	0.07649	2.09178	0.172831	81	13.0736		FGIL37_018	0
[truncated: 17 more columns]
